# Supplementary material for: Validation of a Case-Finding Algorithm for Identifying Patients with Non-small Cell Lung Cancer (NSCLC) in Administrative Claims Databases
Source: PubMed Central journal article supplement (PMC5714924; doi:10.3389/fphar.2017.00883), 2017-11-30
Supplement: AppendixA.pdf [file AppendixA.pdf]

1 **APPENDIX A. Codes for NSCLC Case-Finding Algorithm Scoring** (Schulman et al., 2013)

| Therapy/Scan                           | GPI Code       | HCPCS Code                                    | ICD-9 Procedure Code     | ICD-10 Procedure Code  | CPT Code        |
|----------------------------------------|----------------|-----------------------------------------------|--------------------------|------------------------|-----------------|
| PET scan                               |                | G0210-<br>G0211,<br>G0126,<br>G0212,<br>G0234 |                          |                        |                 |
| Lung removal or resection surgery      |                |                                               | 32.0x,<br>32.1,<br>32.9x | 0B5x,<br>0BBx,<br>0BTx | 32440-<br>32525 |
| Abiraterone (paclitaxel protein bound) | 21500012201920 | J9264                                         |                          |                        |                 |
| Afatinib                               | 21534006x      |                                               |                          |                        |                 |
| Alectinib                              | 21534007100120 |                                               |                          |                        |                 |
| Bendamustine                           | 2110000910x    | J9033                                         |                          |                        |                 |
| Bevacizumab                            | 21335020x      | J9035,<br>Q2024                               |                          |                        |                 |
| Carboplatin                            | 21100015x      | J9045                                         |                          |                        |                 |
| Ceritinib                              | 21534014000130 |                                               |                          |                        |                 |
| Cisplatin                              | 21100020x      | J9060                                         |                          |                        |                 |
| Crizotinib                             | 215340150001x  |                                               |                          |                        |                 |
| Cyclophosphamide                       | 21101020x      | J9070,<br>J8530                               |                          |                        |                 |
| Docetaxel                              | 21500005x      | J9171                                         |                          |                        |                 |
| Doxorubicin                            | 21200040x      | Q2049,<br>Q2050,<br>J9000                     |                          |                        |                 |
| Erlotinib                              | 21534025x      |                                               |                          |                        |                 |
| Etoposide                              | 21500010x      | J8560,<br>J9181,<br>J9182,<br>C9414,<br>C9425 |                          |                        |                 |
| Gefitinib                              | 21534030x      | J8565                                         |                          |                        |                 |
| Gemcitabine                            | 21300034x      | J9201                                         |                          |                        |                 |
| Ifosfamide                             | 21101025x      | J9208                                         |                          |                        |                 |
| Irinotecan                             | 21335010x      | J9206                                         |                          |                        |                 |
| Osimertinib                            | 215340652003x  |                                               |                          |                        |                 |
| Paclitaxel                             | 215000120013x  | J9267                                         |                          |                        |                 |
| Pemetrexed                             | 21300053x      | J9305                                         |                          |                        |                 |
| Temozolomide                           | 21104070x      | J8700,<br>J9328                               |                          |                        |                 |
| Topotecan                              | 21550080x      | J9351,<br>J8705                               |                          |                        |                 |
| Vinblastine                            | 21500030x      | J9360                                         |                          |                        |                 |

|             |           |                 |  |  |  |
|-------------|-----------|-----------------|--|--|--|
| Vincristine | 21500020x | J9370,<br>J9371 |  |  |  |
| Vinorelbine | 21500050x | J9390           |  |  |  |

CPT, Current Procedural Terminology; GPI, generic product identifier; HCPCS, Healthcare Common Procedure Coding System; PET, position emission tomography.

2

3
